# Supplementary material for: Looking at Cerebellar Malformations through Text-Mined Interactomes of Mice and Humans
Source: PubMed Central journal article supplement (PMC2767227; doi:10.1371/journal.pcbi.1000559), 2009-11-06

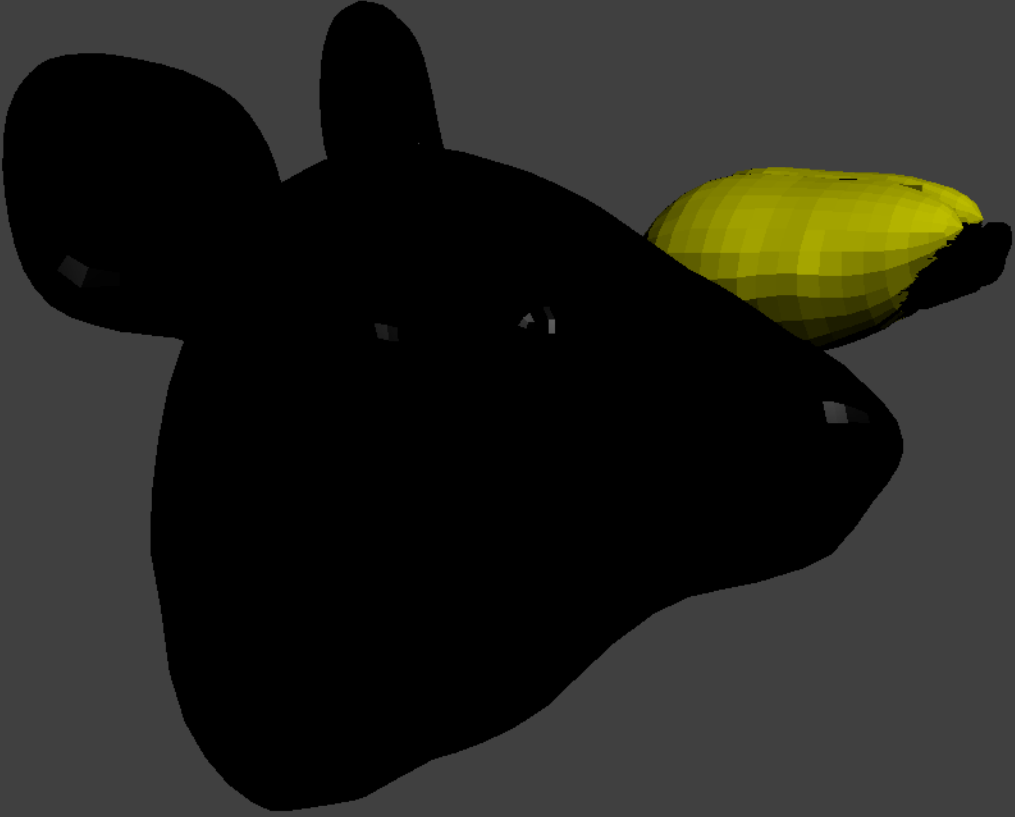

Supplement: pcbi.1000559.s002.pdf [file pcbi.1000559.s002.pdf]
