# Supplementary material for: Looking at Cerebellar Malformations through Text-Mined Interactomes of Mice and Humans
Source: PLOS journal article supplement (doi:10.1371/journal.pcbi.1000559), 2009-11-05
Supplement: S6 (10.1371/journal.pcbi.1000559.s006) [file journal.pcbi.1000559.s006.pdf › journal.pcbi.1000559.s006.pdf]

**Table S4. Results of the tests for high connectivity of the phenotype genes.**

|                           |                     | <b>p-value</b>      |                     |            |  |
|---------------------------|---------------------|---------------------|---------------------|------------|--|
|                           | <b>whole</b>        | <b>hprd</b>         | <b>physical</b>     | <b>Y2H</b> |  |
| <b>all</b>                | $1 \times 10^{-25}$ | $1 \times 10^{-10}$ | $5 \times 10^{-17}$ | 0.045      |  |
| <b>degeneration</b>       | $6 \times 10^{-5}$  | 0.224               | 0.010               | 0.613      |  |
| <b>abnormal foliation</b> | $1 \times 10^{-08}$ | 0.002               | $7 \times 10^{-6}$  | 0.267      |  |
| <b>abnormal vermis</b>    | $6 \times 10^{-07}$ | $3 \times 10^{-4}$  | $5 \times 10^{-6}$  | 0.045      |  |
| <b>absent cerebellum</b>  | $4 \times 10^{-4}$  | 0.852               | 0.414               | N/A        |  |
| <b>small cerebellum</b>   | $8 \times 10^{-09}$ | $2 \times 10^{-4}$  | $6 \times 10^{-6}$  | 0.843      |  |
| <b>ataxia</b>             | $5 \times 10^{-15}$ | $2 \times 10^{-7}$  | $2 \times 10^{-11}$ | 0.061      |  |
