# Supplementary material for: Looking at Cerebellar Malformations through Text-Mined Interactomes of Mice and Humans
Source: PLOS journal article supplement (doi:10.1371/journal.pcbi.1000559), 2009-11-05
Supplement: S7 (10.1371/journal.pcbi.1000559.s007) [file journal.pcbi.1000559.s007.pdf › journal.pcbi.1000559.s007.pdf]

**Table S5. Results of the tests for clustering of the phenotype genes. See the main text for a description of the three tests Mod, Ini, and Rwr.**

|                           |     | <b>whole</b>          | <b>hprd</b>           | <b>physical</b>       |
|---------------------------|-----|-----------------------|-----------------------|-----------------------|
| <b>network size</b>       |     | [ 11,530 / 98,634 ]   | [ 9,303 / 34,998 ]    | [ 10,475 / 51,974 ]   |
| <b>[ Nodes / Edges ]</b>  |     |                       |                       |                       |
| <b>all</b>                |     | [ 236 / 399 ]         | [ 212 / 120 ]         | [ 225 / 184 ]         |
| p-values                  | Mod | $< 1 \times 10^{-16}$ | $< 1 \times 10^{-16}$ | $< 1 \times 10^{-16}$ |
|                           | Ini | $< 0.001$             | $< 0.001$             | $< 0.001$             |
|                           | Rwr | $< 0.001$             | $< 0.001$             | $< 0.001$             |
| <b>degeneration</b>       |     | [ 39 / 10 ]           | [ 34 / 2 ]            | [ 38 / 4 ]            |
| p-values                  | Mod | $3 \times 10^{-7}$    | 0.092                 | 0.006                 |
|                           | Ini | 0.003                 | 0.066                 | 0.008                 |
|                           | Rwr | 0.002                 | 0.199                 | 0.085                 |
| <b>abnormal foliation</b> |     | [ 55 / 47 ]           | [ 49 / 15 ]           | [ 52 / 21 ]           |
| p-values                  | Mod | $< 1 \times 10^{-16}$ | $1 \times 10^{-13}$   | $< 1 \times 10^{-16}$ |
|                           | Ini | $< 0.001$             | $< 0.001$             | $< 0.001$             |
|                           | Rwr | $< 0.001$             | $< 0.001$             | $< 0.001$             |
| <b>abnormal vermis</b>    |     | [ 24 / 17 ]           | [ 21 / 4 ]            | [ 22 / 5 ]            |
| p-values                  | Mod | $< 1 \times 10^{-16}$ | $3 \times 10^{-5}$    | $3 \times 10^{-6}$    |
|                           | Ini | $< 0.001$             | $< 0.001$             | $< 0.001$             |
|                           | Rwr | $< 0.001$             | 0.184                 | 0.27                  |
| <b>absent cerebellum</b>  |     | [ 10 / 13 ]           | [ 9 / 0 ]             | [ 9 / 1 ]             |
| p-values                  | Mod | $< 1 \times 10^{-16}$ | N/A                   | 0.028                 |
|                           | Ini | $< 0.001$             | 1                     | 0.03                  |
|                           | Rwr | $< 0.001$             | 1                     | 0.081                 |
| <b>small cerebellum</b>   |     | [ 68 / 54 ]           | [ 60 / 20 ]           | [ 64 / 27 ]           |
| p-values                  | Mod | $< 1 \times 10^{-16}$ | $< 1 \times 10^{-16}$ | $< 1 \times 10^{-16}$ |
|                           | Ini | $< 0.001$             | $< 0.001$             | $< 0.001$             |
|                           | Rwr | $< 0.001$             | $< 0.001$             | $< 0.001$             |
| <b>ataxia</b>             |     | [ 165 / 176 ]         | [ 149 / 49 ]          | [ 157 / 84 ]          |
| p-values                  | Mod | $< 1 \times 10^{-16}$ | $1 \times 10^{-16}$   | $< 1 \times 10^{-16}$ |
|                           | Ini | $< 0.001$             | $< 0.001$             | $< 0.001$             |
|                           | Rwr | $< 0.001$             | $< 0.001$             | $< 0.001$             |
