# Supplementary material for: Looking at Cerebellar Malformations through Text-Mined Interactomes of Mice and Humans
Source: PLoS Comput Biol. 2009 Nov 6;5(11):e1000559. doi: 10.1371/journal.pcbi.1000559 (PMC2767227; doi:10.1371/journal.pcbi.1000559)
Supplement: Table S1 — Complete list of Geneways action types. (0.07 MB XLS) [file pcbi.1000559.s003.xls]

## Sheet: complete_action_report
Table S1. Complete list of Geneways action types.
Action Type	Action Count	Action Mention Count	PLO classification	Action Type Ontology Parents	GW60 Action Mention Counts
induce	331598	695615	L	activate	315146
bind	343429	532385	P	physicalactiontype	309106
inhibit	268678	386523	L	inactivate	176156
associate	264017	370133	.	bind	143449
contain	260775	366654	.	consistof	288924
activate	190399	332336	L	logicalactiontype	194038
mediate	152985	292657	L	regulate	154000
regulate	166811	272879	L	logicalactiontype	158753
interact	175540	258988	L	regulate	152335
express	142687	184719	.	biochemicalactiontype	140972
encode	134861	184124	.	substancerelationtype	125443
stimulate	116473	183863	L	activate	82515
increase	148860	183539	L	activate	65128
produce	122101	172454	.	biochemicalactiontype	66839
cause	125210	165135	L	activate	56846
result in	116208	135750	.	causedby	59374
depend on	82238	130461	L	regulate	66846
phosphorylate	70465	130301	P	createbond	72295
homolog	85049	124516	.	substancerelationtype	74965
affect	105764	120285	L	regulate	51422
require	77481	101765	.	regulate	56625
required for	68509	100872	.	regulate	59881
enhance	76282	97452	L	activate	40690
block	71351	89808	L	inactivate	46823
lead to	70117	84614	L	lead	37444
include	72293	81292	.	consistof	42457
form	58118	77033	.	produce	39911
promote	51905	75472	L	activate	40967
suppress	55374	71994	L	inactivate	32849
due to	55028	71983	.	regulate	17772
respond	46459	68614	.	regulate	0
reduce	58547	66744	.	covalentlymodify	0
determine	50865	62609	L	regulate	26763
add	48124	62237	.	bind	34702
control	44488	61060	L	regulate	28716
modulate	37431	53831	L	regulate	29458
carry	45216	53691	.	transport	39704
generate	41991	51004	L	activate	23569
alter	41789	48071	.	covalentlymodify	20872
link	35944	46412	.	createbond	23825
replace	34164	46264	.	bind	25397
synthesize	32407	44261	.	createbond	17420
signal	28730	40711	L	regulate	21964
couple	27683	40072	.	bind	24078
combine	31074	38026	.	bind	14531
react	32886	36887	L	covalentlymodify; regulate	13929
cleave	24093	35573	P	breakbond	19961
influence	30971	34988	L	regulate	13630
modify	26567	34267	.	biochemicalactiontype	15767
recruit	23233	33957	.	bind	18897
release	25438	33230	.	physicalactiontype	10843
recognize	27107	30287	.	bind	0
catalyze	22122	30203	P	activate	14058
conjugate	18470	28882	.	physicalactiontype	12589
inactivate	20670	27341	L	logicalactiontype	12629
repress	18353	26280	L	inactivate	14566
overexpress	18480	26126	.	express	14087
immunoprecipitate	24076	26119	P	bind	16805
substitute	16171	25714	.	biochemicalactiontype; physicalactiontype	12176
digest	19707	25640	P	breakbond	14481
abolish	22310	24631	L	inactivate	11752
attenuate	20278	24494	L	inactivate	10381
prevent	22013	24416	.	inactivate	0
degrade	16591	23816	P	breakbond	13107
result from	20705	23495	.	causedby	9509
colocalize	18661	23060	P	physicalactiontype	12114
trigger	16552	22295	L	activate	10730
based on	18104	21415	.	regulate	8582
separate	15310	20685	.	physicalactiontype	10535
up-regulate	16278	20213	L	activate	11620
elevate	17495	19889	L	activate	6210
independence	13642	19719	.	independentof	4658
respond to	16784	19097	.	respond	6433
disrupt	15144	18751	L	inactivate	11219
secrete	13353	18698	.	release	6263
elicit	14738	17870	L	activate	7703
fuse	15970	17776	.	createbond	0
antagonize	12772	17358	L	inactivate	7605
analog	12040	17063	.	substancerelationtype	5410
effect	14795	16727	.	regulate	0
down-regulate	12743	16353	L	inactivate	9334
initiate	11970	16224	L	activate	8500
remove	12865	15284	.	transport	6302
coexpress	12026	14053	.	biochemicalactiontype	8544
ortholog	11053	14042	.	homolog	6537
because of	12437	13635	L	activate	4949
pair	10823	12704	.	bind	6498
attach	9441	12348	P	bind	6166
assemble	8387	12263	.	bind	7676
transfer	9672	11833	.	physicalactiontype; transport	0
limit	10176	11569	L	inactivate	4975
form a complex	9477	11502	P	bind	6951
precede	9578	11458	.	before	4929
exhibit	10748	11322	.	physicalactiontype	0
deplete	8590	11315	.	inactivate	0
account for	9719	10884	.	causal	5231
direct	9935	10822	.	regulate	0
coimmunoprecipitate	9396	10810	P	bind	7289
restrict	7699	9672	.	inactivate	0
abrogate	8517	9624	L	inactivate	4553
accelerate	7188	9608	L	activate	4475
make	8720	9586	.	activate	0
loose	8225	8853	.	unloose	0
sensitize	6541	8640	L	activate	2575
dephosphorylate	6016	8586	P	breakbond	5054
facilitate	7552	8337	.	activate	0
connect	6713	8206	.	bind	4383
as a result of	6683	7576	.	causedby	2370
transport	6256	7400	.	biochemicalactiontype; physicalactiontype	0
synergize	5055	7322	P	bind; regulate	3698
free	5299	7312	.	release	0
bond	5848	7308	.	bind; biochemicalactiontype	2298
adhere	6098	7289	.	bind	0
upregulate	6619	7287	L	up-regulate	0
dissociate	5583	7141	.	release	2742
coprecipitate	6065	6846	P	bind	4755
methylate	4669	6773	P	createbond	3185
raise	6296	6654	.	activate	0
transactivate	4966	6585	L	activate	3869
drive	5916	6505	.	regulate	0
distribute	6078	6495	.	transport	0
evoke	5012	6399	.	activate	0
oxidate	4330	6371	.	createbond	0
splice	4535	6333	.	biochemicalactiontype	4048
comprise	5914	6222	.	consistof	0
compose	5535	6210	.	consistof	0
acetylate	3475	6134	.	createbond	3657
constitute	5616	6055	.	consistof	0
stabilize	5133	6055	.	biochemicalactiontype; physicalactiontype	0
retain	5273	5719	.	bind	0
transmit	4422	5469	.	regulate; transport	0
interfere	5129	5430	.	biochemicalactiontype; physicalactiontype	0
contact	4455	5187	.	physicalactiontype	0
precipitate	4535	4933	.	bind	0
coat	3920	4799	.	bind; biochemicalactiontype	0
code	3867	4786	.	encode	0
neutralize	4023	4518	.	inactivate	0
delay	3961	4369	.	inactivate	0
channel	3342	4291	.	transport	0
downregulate	3898	4289	L	down-regulate	0
arrest	3310	4278	L	inactivate	2492
aggregate	3361	4091	.	bind	1845
rescue from	3651	4079	.	rescue	0
deliver	3528	4030	.	transport	0
cross-link	3409	3928	.	cross-react	0
harbor	3450	3661	.	bind	0
activity	3241	3627	.	property	0
enable	3380	3548	.	activate	0
translocate	2984	3499	.	transport	0
cross-react	3214	3325	.	physicalactiontype; react	0
dissociate from	2640	3321	.	release	1963
co-express	3087	3310	.	express	0
compete	2991	3303	.	biochemicalactiontype; physicalactiontype	0
hydrolyze	2858	3223	.	breakbond	0
hybridize	2862	3083	.	bind	0
cooperate	2554	3068	L	co-operate	0
copurify	2651	2986	.	physicalactiontype	1936
metabolize	2680	2985	.	covalentlymodify	0
depress	2600	2754	.	inactivate	0
fold	2467	2669	.	biochemicalactiontype; physicalactiontype	0
cut	2184	2619	.	breakbond	1611
ubiquitinate	1655	2449	P	createbond	1314
moderate	2230	2443	.	regulate	0
truncate	2036	2367	P	breakbond	1521
anchor	1840	2333	.	bind; biochemicalactiontype	0
join	1977	2276	.	bind	1234
transcribe	1991	2251	.	biochemicalactiontype	1666
may be responsible for	2192	2243	.	causal	894
needed for	2040	2197	.	regulate	1133
polymerize	1310	2069	.	createbond	1224
divide	1697	1979	.	breakbond	912
impact	1822	1933	.	regulate	0
provoke	1818	1932	.	activate	0
attributable to	1646	1857	.	property	528
silence	1593	1829	.	inactivate	0
engage	1514	1787	.	regulate	0
mutate	1490	1752	.	covalentlymodify	516
solubilize	1526	1735	.	biochemicalactiontype; physicalactiontype	0
sequester	1410	1694	.	bind; biochemicalactiontype	0
deposit	1435	1677	.	physicalactiontype	0
locate	1546	1676	.	relocate	0
co-transfect	1501	1662	.	biochemicalactiontype; physicalactiontype	0
start	1536	1658	.	initiate	0
fix	1421	1638	.	bind	0
switch	1381	1630	.	regulate	0
destroy	1488	1623	.	breakbond	0
integrate	1371	1505	.	bind	0
prompt	1444	1494	L	activate	666
ablate	1182	1422	.	activate	0
fractionate	1235	1391	.	physicalactiontype	0
lead	1000	1379	.	regulate	0
capture	1137	1336	.	bind	0
order	1219	1326	.	regulate	0
export	1012	1276	.	transport	0
hydroxylate	961	1259	.	createbond	0
hyperphosphorylate	825	1157	P	phosphorylate	683
immobilize	1025	1150	.	bind; biochemicalactiontype	0
excise	1076	1141	.	breakbond	0
interrupt	1060	1139	.	inactivate	0
denature	978	1136	.	biochemicalactiontype; physicalactiontype	0
force	915	1110	.	activate	0
liberate	980	1083	.	release	397
sort	971	1077	.	transport	0
deacetylate	694	1074	P	breakbond	505
attributed to	1004	1069	.	property	267
destabilize	942	1025	.	inactivate	0
govern	960	1020	.	regulate	0
redistribute	846	958	.	distribute	0
synergistic interaction	703	931	P	synergize	435
overproduce	858	924	.	produce	0
hydrolyse	822	917	P	breakbond	287
dimerize	793	896	.	polymerize	0
synergy	572	879	P	synergize	477
charge	796	863	.	bind; createbond	0
part	798	856	.	release	0
hinder	800	855	L	inactivate	428
bridge	775	848	.	createbond	0
break	747	839	.	breakbond	423
depolymerize	528	836	P	breakbond	462
discharge	660	789	.	release	311
deactivate	624	778	L	inactivate	419
dock	705	761	.	bind	0
glycosylate	697	759	.	createbond	0
synergistic action	466	752	L	synergize	383
cap	595	750	.	createbond	0
bring about	731	744	.	activate	0
harbour	698	735	.	harbor	0
mask	667	711	.	inactivate	0
disassemble	532	703	P	breakbond	428
shape	606	662	.	regulate	0
excite	577	652	.	activate	0
boost	503	643	.	activate	0
split	572	618	P	breakbond	257
stop	559	599	.	inactivate	0
pump	499	573	.	transport	0
unfold	481	540	.	biochemicalactiontype; physicalactiontype	0
biotinylate	507	539	.	createbond	0
alkylate	457	519	.	createbond	0
restrain	436	491	L	inactivate	211
sever	231	478	P	breakbond	254
constrain	420	464	L	inactivate	243
bring	439	457	.	transport	0
deaminate	248	442	P	breakbond	442
demethylate	348	428	P	breakbond	171
acylate	361	394	.	createbond	0
paralog	352	394	.	homolog	127
act synergistically	338	384	P	bind	209
sulphate	301	379	.	createbond	0
iodinate	338	370	P	createbond	204
mutagenize	300	352	.	mutate	0
hold	283	351	.	bind	0
suppress activity of	330	345	L	inactivate	10
endow	331	343	.	physicalactiontype	0
issue	262	334	.	release	0
clamp	284	329	.	createbond	0
translate	305	328	.	biochemicalactiontype	166
fire	287	315	.	activate	0
die	255	292	.	inactivate	0
refold	280	291	.	fold; physicalactiontype	0
hypermethylate	248	276	P	createbond	90
send	259	275	.	transport	0
ubiquitylate	215	273	.	ubiquitinate	0
myristoylate	233	264	P	createbond	161
unwind	231	264	.	biochemicalactiontype; physicalactiontype	0
carboxylate	198	256	.	createbond	0
hyperacetylate	179	255	P	acetylate	104
shuttle	215	242	.	biochemicalactiontype; physicalactiontype	0
pump in	193	230	.	pump	0
deglycosylate	216	226	.	breakbond	0
cross react	219	225	.	cross-react	0
disable	208	222	.	inactivate	0
hypophosphorylate	201	220	P	phosphorylate	141
prenylate	173	218	P	createbond	142
proteolyze	207	216	P	breakbond	130
relocalize	198	212	.	relocate	0
kindle	141	206	.	enkindle	0
cop	170	194	.	inactivate	0
import	174	183	.	transport	0
expel	151	174	.	release	0
act upon	164	165	.	regulate	0
glycate	130	163	.	createbond	0
tie	158	163	.	bind	80
function as a negative regulator of	146	155	.	inactivate	0
nucleotide exchange	122	155	.	createbond	0
wind	145	155	.	biochemicalactiontype; physicalactiontype	0
relocate	146	153	.	transport	0
heterodimerize	134	148	.	polymerize	0
hasten	120	144	L	activate	47
heighten	141	144	.	activate	0
structural analog	134	143	.	analog	0
halt	137	140	.	inactivate	0
incite	119	130	L	activate	41
synergistic cooperation	36	111	P	synergize	93
palmitoylate	93	104	.	createbond	0
co-operate	87	102	.	bind; regulate	0
unpair	89	101	.	release	53
polyubiquitinate	93	100	.	ubiquitinate	0
instigate	62	99	L	activate	56
steer	78	98	.	regulate	0
co-regulate	94	96	.	regulate	0
eject	78	95	.	release	0
cue	89	91	.	activate	0
catch	81	84	.	bind	0
co-transcribe	74	78	.	transcribe	0
deamidate	63	75	.	breakbond	0
bear on	72	74	.	bear upon	0
lift	71	73	.	activate	0
shut	69	73	.	inactivate	0
nail	52	71	.	inactivate	0
multimerize	64	69	.	polymerize	0
touch	50	58	.	bear upon	0
diphosphorylate	46	53	P	phosphorylate	30
co-transfer	38	52	.	transfer	0
add up	48	51	.	bind	28
death	46	50	.	die	0
mannosylate	39	48	P	createbond	30
settle	41	46	.	relocate	0
rout	42	43	.	transport	0
shut down	42	43	.	inactivate	0
pick up	39	39	.	bind	0
expedite	38	38	.	activate	0
secure	37	38	.	bind	0
speed up	37	38	.	activate	0
functional analog	37	37	.	analog	0
n-acetylate	34	37	P	createbond	5
formylate	31	34	.	createbond	0
arylate	30	30	.	createbond	0
stick	30	30	.	bind	0
urge	28	30	L	activate	2
carbamylate	28	29	P	createbond	7
polyubiquitylate	26	29	.	ubiquitinate	0
electrotransfer	24	27	.	physicalactiontype; transfer	0
further	27	27	.	regulate	5
cross link	23	26	.	cross-link	0
work synergistically	24	25	P	synergize	18
hypoacetylate	21	24	.	acetylate	0
n-glycosylate	4	24	P	createbond	22
disengage	22	22	.	release	8
spark	19	22	.	activate	0
curb	20	21	.	regulate	0
cross reacting	19	19	.	cross-react	0
homodimerize	17	19	.	bind	0
function synergistically	18	18	P	synergize	13
have an active role in	17	18	.	activate	9
co-produce	15	16	.	produce	0
synergistic association	12	15	P	synergize	10
trigger off	15	15	.	trigger	0
vie	15	15	.	compete	0
unblock	14	14	.	release	0
geranylgeranylate	12	13	.	createbond	0
regularize	11	13	.	regulate	0
n-acylate	12	12	P	createbond	7
pump out	12	12	.	pump	0
stick to	12	12	.	stick	0
underexpress	11	12	.	express	0
actuate	11	11	.	activate	0
DNA-wind	10	10	.	wind	0
grab	10	10	.	bind	0
DNA-unwind	9	9	.	unwind	0
bandage	9	9	.	bind	0
co-translate	8	9	.	translate	0
recharge	9	9	.	charge	0
rush	8	8	.	activate	0
ubiquitinize	8	8	P	ubiquitinate	2
co-translocate	7	7	.	translocate	0
effectuate	7	7	.	effect	0
fasten	7	7	.	bind; biochemicalactiontype	0
set off	7	7	.	activate	0
underproduce	7	7	.	produce	0
get rid of	6	6	.	inactivate; transport	0
co-deliver	5	5	.	deliver	0
amidinate	4	4	.	createbond	0
photoreactivate	4	4	L	activate	0
inflect	3	3	.	regulate	0
mediate a signal	3	3	L	mediate	3
o-glycosylate	3	3	P	createbond	0
touch on	3	3	.	bear upon	0
xenolog	3	3	.	homolog	0
baffle	1	2	.	regulate	0
co-transmit	2	2	.	transmit	0
contend	2	2	.	compete	0
cysteinylate	2	2	.	createbond	0
guanidinate	2	2	.	createbond	0
hew	2	2	.	breakbond	2
set free	2	2	.	release	0
bear upon	1	1	.	regulate	0
charge up	1	1	.	charge	0
polyubiquitinylate	1	1	.	createbond	0
surcharge	1	1	.	charge	0
synergistic integration	1	1	L	synergize	0
truss	1	1	.	bind	0
actiontype	0	0	.		0
after	0	0	.	temporal	0
apprehend	0	0	.	inactivate	0
before	0	0	.	temporal	0
biochemicalactiontype	0	0	.	actiontype	0
break-cys-cys-bond	0	0	.	breakbond	0
breakbond	0	0	.	covalentlymodify	0
callforth	0	0	.	activate	0
carboxyl-methylate	0	0	.	methylate	0
causal	0	0	.	processrelationtype	0
causedby	0	0	.	causal	0
channelize	0	0	.	channel	0
cisactivate	0	0	.	activate	0
co-fractionate	0	0	.	physicalactiontype	0
co-immunoprecipitate	0	0	.	bind	0
co-localize	0	0	.	physicalactiontype	0
co-migrate	0	0	.	physicalactiontype	0
co-precipitate	0	0	.	bind	0
co-purify	0	0	.	physicalactiontype	0
complement	0	0	.	physicalactiontype	0
componentof	0	0	.	substancerelationtype	0
concurrent	0	0	.	temporal	0
consistof	0	0	.	substancerelationtype	0
convey a signal	0	0	.	regulate	0
covalentlymodify	0	0	.	biochemicalactiontype	0
createbond	0	0	.	covalentlymodify	0
dehydrolyze	0	0	.	breakbond	0
enkindle	0	0	.	activate	0
farnesylate	0	0	.	createbond	0
formdisulphidebond	0	0	.	createbond	0
generalsimilarity	0	0	.	relationtype	0
getholdof	0	0	.	bind	0
giveup	0	0	.	release	0
gluthathionylate	0	0	.	createbond	0
hassameimpact	0	0	.	relativeimpact	0
hasstrongerimpact	0	0	.	relativeimpact	0
hasweakerimpact	0	0	.	relativeimpact	0
heteropolymerize	0	0	.	bind	0
holdfast	0	0	.	bind	0
homopolymerize	0	0	.	bind	0
in response to	0	0	.	activate	0
independentof	0	0	.	causal	0
isasreliableas	0	0	.	reliability	0
kickup	0	0	.	activate	0
letgo	0	0	.	release	0
letgoof	0	0	.	letgo	0
logicalactiontype	0	0	.	actiontype	0
make-cys-cys-bond	0	0	.	formdisulphidebond	0
modifies	0	0	.	biochemicalactiontype	0
mono(adpribosy)late	0	0	.	createbond	0
morelikelytobetrue	0	0	.	reliability	0
notsimilar	0	0	.	generalsimilarity	0
nucleotidylate	0	0	.	createbond	0
o-phosphorylate	0	0	.	phosphorylate	0
overcharge	0	0	.	charge	0
physicalactiontype	0	0	.	actiontype	0
poly(adpribosy)late	0	0	.	createbond	0
polyubiquitinize	0	0	.	ubiquitinate	0
processrelationtype	0	0	.	relationtype	0
prolyl-4-hydroxylate	0	0	.	createbond	0
property	0	0	.	relationtype	0
putout	0	0	.	release	0
raceup	0	0	.	activate	0
ravish	0	0	.	transport	0
relationtype	0	0	.		0
relativeimpact	0	0	.	processrelationtype	0
reliability	0	0	.	processrelationtype	0
remove-n-signal	0	0	.	breakbond	0
rescue	0	0	.	inactivate	0
resequester	0	0	.	bind	0
rna-unwind	0	0	.	unwind	0
rna-wind	0	0	.	wind	0
sensibilize	0	0	.	sensitize	0
sensify	0	0	.	sensitize	0
similar	0	0	.	generalsimilarity	0
stearoylate	0	0	.	createbond	0
strongly	0	0	.	similar	0
substancerelationtype	0	0	.	relationtype	0
superactivate	0	0	.	activate	0
supercharge	0	0	.	charge	0
switch on the activity of	0	0	.	activate	0
temporal	0	0	.	processrelationtype	0
touchoff	0	0	.	activate	0
undercharge	0	0	.	charge	0
unfreeze	0	0	.	release	0
unloose	0	0	.	release	0
verbcomplex	0	0	.	form a complex	0
weakly	0	0	.	similar	0
