# Supplementary material for: Looking at Cerebellar Malformations through Text-Mined Interactomes of Mice and Humans
Source: PLoS Comput Biol. 2009 Nov 6;5(11):e1000559. doi: 10.1371/journal.pcbi.1000559 (PMC2767227; doi:10.1371/journal.pcbi.1000559)
Supplement: Table S2 — Pairwise phenotype overlap. The significance is measured based on a whole genome comprised of 25,000 genes. (0.03 MB DOC) [file pcbi.1000559.s004.pdf]

**Table S2. Pairwise phenotype overlap. The significance is measures based on a whole genome comprised of 25,000 genes. ↓ the observed overlap is less than expected.**

|                           | degeneration       | abnormal<br>foliation | abnormal<br>vermis  | absent<br>cerebellum | small<br>cerebellum | ataxia |
|---------------------------|--------------------|-----------------------|---------------------|----------------------|---------------------|--------|
| <b>gene count</b>         | 39                 | 56                    | 24                  | 10                   | 70                  | 172    |
| <b>abnormal foliation</b> | 1                  |                       |                     |                      |                     |        |
| expected                  | 0.087              |                       |                     |                      |                     |        |
| <i>p</i> -value           | 0.003              |                       |                     |                      |                     |        |
| <b>abnormal vermis</b>    | 2                  | 11                    |                     |                      |                     |        |
| expected                  | 0.037              | 0.054                 |                     |                      |                     |        |
| <i>p</i> -value           | $7 \times 10^{-6}$ | $2 \times 10^{-11}$   |                     |                      |                     |        |
| <b>absent cerebellum</b>  | 0 <sup>↓</sup>     | 2                     | 3                   |                      |                     |        |
| expected                  | 0.016              | 0.022                 | 0.010               |                      |                     |        |
| <i>p</i> -value           | 0.985              | $1 \times 10^{-6}$    | $2 \times 10^{-10}$ |                      |                     |        |
| <b>small cerebellum</b>   | 8                  | 37                    | 13                  | 2                    |                     |        |
| expected                  | 0.109              | 0.157                 | 0.067               | 0.028                |                     |        |
| <i>p</i> -value           | $<10^{-12}$        | $2 \times 10^{-12}$   | $4 \times 10^{-11}$ | $2 \times 10^{-6}$   |                     |        |
| <b>ataxia</b>             | 28                 | 22                    | 12                  | 2                    | 36                  |        |
| expected                  | 0.268              | 0.385                 | 0.165               | 0.069                | 0.482               |        |
| <i>p</i> -value           | $<10^{-12}$        | $2 \times 10^{-11}$   | $5 \times 10^{-11}$ | $4 \times 10^{-5}$   | $4 \times 10^{-11}$ |        |
