# Supplementary material for: Looking at Cerebellar Malformations through Text-Mined Interactomes of Mice and Humans
Source: PLoS Comput Biol. 2009 Nov 6;5(11):e1000559. doi: 10.1371/journal.pcbi.1000559 (PMC2767227; doi:10.1371/journal.pcbi.1000559)
Supplement: Table S3 — Pairwise phenotype overlap. The significance is measured based on a ataxia sub-network comprising 172 genes. (0.03 MB DOC) [file pcbi.1000559.s005.pdf]

Table S3. Pairwise phenotype overlap. The significance is measures based on a ataxia sub-network comprising 172 genes. ↓ the observed overlap is less than expected.

|                           | degeneration | abnormal<br>foliation | abnormal<br>vermis | absent<br>cerebellum | small<br>cerebellum |
|---------------------------|--------------|-----------------------|--------------------|----------------------|---------------------|
| <b>gene count</b>         | 28           | 22                    | 12                 | 2                    | 36                  |
| <b>abnormal foliation</b> | 1↓           |                       |                    |                      |                     |
| expected                  | 3.581        |                       |                    |                      |                     |
| <i>p</i> -value           | 0.090        |                       |                    |                      |                     |
| <b>abnormal vermis</b>    | 1↓           | 8                     |                    |                      |                     |
| expected                  | 1.953        | 1.535                 |                    |                      |                     |
| <i>p</i> -value           | 0.387        | $3 \times 10^{-7}$    |                    |                      |                     |
| <b>absent cerebellum</b>  | 0↓           | 1                     | 1                  |                      |                     |
| expected                  | 0.326        | 0.256                 | 0.140              |                      |                     |
| <i>p</i> -value           | 0.700        | 0.016                 | 0.004              |                      |                     |
| <b>small cerebellum</b>   | 7            | 18                    | 10                 | 1                    |                     |
| expected                  | 5.860        | 4.605                 | 2.512              | 0.419                |                     |
| <i>p</i> -value           | 0.200        | $1 \times 10^{-12}$   | $9 \times 10^{-8}$ | 0.043                |                     |
