# Supplementary material for: Looking at Cerebellar Malformations through Text-Mined Interactomes of Mice and Humans
Source: PLoS Comput Biol. 2009 Nov 6;5(11):e1000559. doi: 10.1371/journal.pcbi.1000559 (PMC2767227; doi:10.1371/journal.pcbi.1000559)
Supplement: Table S6 — Complete gene predictions. (0.06 MB XLS) [file pcbi.1000559.s008.xls]

## Sheet: Sheet1
Gene Id	Gene Symbol	Is Initial?	Initial neighbors	Node degree			p-Value (rwr-trn)
				whole	hprd	physical	whole	hprd	physical
degeneration
412	sts		npc1, agtpbp1	40		1	2.09e-05		0.395746
abnormal foliation
7471	wnt1		ccnd1, ccnd2, ctnna2, en1, en2, gas1, lmx1a, ptch1, pten	112	9	21	7.67e-07	0.999976	0.371637
abnormal vermis
22943	dkk1		en1, fgfr1, msx2, tp53	36	5	6	4.7e-06	0.962391	0.983136
5076	pax2		en2, fgf8, pax5, rb1, tp53	55	7	16	7.55e-06	0.040977	0.012489
2253	fgf8	YES	en1, en2, fgf17, fgfr1, pax5, zic1	121	4	14	1.11e-05	0.287112	0.355031
4487	msx1		fgf8, lmx1a, msx2, tp53, zic1	83	17	25	1.19e-05	0.003116	0.020236
5077	pax3		fgf8, gli2, msx2, tp53, zic1	57	8	13	4.46e-05	0.589716	0.676288
8817	fgf18		En2, fgf8, fgfr1	14	4	5	6.18e-05	0.114727	0.19352
27330	rps6ka6		fgf8, tp53	6	1	1	7.1e-05	0.33226	0.293856
10253	spry2		erbb3, fgf8, fgfr1	34	12	17	8.07e-05	0.521432	0.037108
81848	spry4		erbb3, fgf8, fgfr1	17	2	6	8.76e-05	0.390871	0.026362
7471	wnt1		ctnna2, en1, en2, fgf8, lmx1a	112	9	21	9.06e-05	0.999781	0.113077
655	bmp7		en1, fgf8, fgfr1, msx2, zic1	77	12	27	9.85e-05	0.955856	0.541657
268	amh		fgf8, rbl1, tp53	60	3	9	0.00012	0.388929	0.053175
1745	dlx1		fgf8	16	1	4	0.000226	0.142809	0.03544
3223	hoxc6		fgf8, fgfr1	8			0.000236
5178	peg3		tp53	10	4	6	0.00026	0.582435	0.380367
7476	wnt7a		en1, fgf8, lmx1a, npc1	28	3	6	0.000331	0.953089	0.848749
2637	gbx2		en2, fgf8, gli2	16			0.000371
2737	gli3		fgf8, fgfr1, gli2, zic1	54	12	21	0.000414	0.025593	0.001773
4613	mycn		npc1, pax5, rb1, tp53	72	6	20	0.000461	0.57752	0.03189
429	ascl1		fgf8	39	6	11	0.000538	0.1972	0.151179
5727	ptch1		fgf8, fgfr1, gli2	39	7	11	0.000545	0.599766	0.533166
17	aavs1		fgfr1, tp53	14		5	0.00056		0.000118
3222	hoxc5		fgf8	4			0.000576
2535	fzd2			6	2	2	0.000615	0.485925	0.132912
8646	chrd		en2, fgf8, fgfr1	57	4	13	0.000762	0.907621	0.389841
54756	il17rd		fgf8, fgfr1	13	2	2	0.000887	0.043503	0.045748
5081	pax7		en1, fgf8, gli2	25	1	3	0.000962	0.593169	0.34026
985	cdc2l2			3		2	0.001144		0.040374
6677	spam1		tp53	4			0.001157
small cerebellum
1020	cdk5		cacna1a, ccnd1, ccnd2, cdk5r1, cdk5r2, dab1, dcx, erbb3, pura, rb1, reln	132	46	88	7.3e-06	1.27e-05	9.34e-07
7471	wnt1		ccnd1, ccnd2, ctnna2, en1, en2, gas1, lmx1a, lmx1b, shh	112	9	21	2.22e-05	0.999918	0.79376
absent cerebellum
2020	en2	YES	en1, fgf8, gbx2, pax2, wnt1	16	1	3	0	0.54709	0.124773
5015	otx2		en2, fgf8, gbx2, pax2, wnt1	55	4	13	5.55112e-15	0.18691	0.427358
2253	fgf8	YES	en1, en2, gbx2, pax2, wnt1	121	4	14	8.03801e-14	0.75773	0.0246476
4010	lmx1b		fgf8, gbx2, pax2, wnt1	18	2	2	3.12639e-13	0.1188	0.115097
2637	gbx2	YES	en2, fgf8, pax2, wnt1	16			1.41942e-12
7471	wnt1	YES	ctnnb1, en1, en2, fgf8, gbx2	112	9	21	1.44362e-12	0.806623	0.0278318
2019	en1	YES	en2, fgf8, wnt1	19	2	2	2.39288e-10	0.088401	0.00835228
5081	pax7		en1, fgf8, wnt1	25	1	3	2.51399e-10	0.625137	0.276668
1747	dlx3		wnt1, zic3	17	1	2	4.2042e-10	0.314051	0.365046
6423	sfrp2		pax2, wnt1	9	3	3	6.29288e-10	0.00023871	4.57775e-07
6496	six3		fgf8, gbx2, wnt1	29	7	8	1.07808e-09	0.329087	1.09328e-05
7476	wnt7a		en1, fgf8, wnt1	28	3	6	2.23394e-09	0.478978	0.211976
221833	sp8		fgf8, gbx2	4			4.64381e-09
655	bmp7		en1, fgf8, pax2	77	12	27	1.60794e-08	0.853286	0.544864
579	bapx1		fgf8, pax2	46		9	1.75971e-08		0.188168
8817	fgf18		en2, fgf8	14	4	5	2.46577e-08	0.305235	0.0213702
9965	fgf19		fgf8, pax2	7	1	1	3.93331e-08	0.220674	0.234337
652	bmp4		en1, fgf8, pax2, wnt1, zic3	175	14	31	6.09266e-08	0.914317	0.0636656
6469	shh		fgf8, gbx2, pax2, wnt1	162	5	20	1.15892e-07	0.986452	1.18557e-07
5076	pax2	YES	en2, fgf8, gbx2	55	7	16	1.46367e-07	0.0407367	0.0781555
2018	emx2		fgf8, wnt1	18	1	6	1.77091e-07	0.50486	9.19479e-05
8326	fzd9		wnt1	4	4	4	2.81191e-07	0.0457956	0.00910655
151449	gdf7		fgf8, wnt1	13	1	1	3.17505e-07	0.489193	0.384486
4487	msx1		fgf8, wnt1, zic3	83	17	25	3.31728e-07	0.229683	0.00282332
2535	fzd2		wnt1	6	2	2	6.7531e-07	0.38468	0.463422
1745	dlx1		fgf8	16	1	4	1.00673e-06	0.0987432	0.00518695
9247	gcm2		fgf8	3			1.14142e-06
7849	pax8		fgf8, pax2	18	5	10	1.22267e-06	0.00430416	2.58102e-07
54361	wnt4		fgf8, pax2	28	4	7	1.22315e-06	0.784859	0.104146
6899	tbx1		fgf8, zic3	38		7	1.29774e-06		0.155012
5986	rfng		wnt1	2			1.61618e-06
7088	tle1		en1, en2, pax2	71	54	59	1.93275e-06	0.566262	0.371365
2736	gli2		gbx2	32	7	12	2.00046e-06	0.387145	0.328651
1750	dlx6		fgf8	6		2	2.01826e-06		0.572805
56033	barx1		fgf8	4			2.2176e-06
64840	porcn		wnt1	13	6	6	2.35184e-06	0.373299	0.00251336
5727	ptch1		fgf8, wnt1	39	7	11	2.62059e-06	0.508973	0.0138204
2737	gli3		fgf8, zic3	54	12	21	3.16708e-06	0.00115605	0.00470571
10468	fst		fgf8, pax2	51	5	14	3.69138e-06	0.73835	0.423014
6507	slc1a3		wnt1	11	1	4	3.71032e-06	0.43886	0.290903
27330	rps6ka6		fgf8	6	1	1	3.95732e-06	0.306436	0.268198
6862	t		fgf8, zic3	28		6	4.57662e-06		0.0767708
3222	hoxc5		fgf8	4			4.70014e-06
4593	musk		wnt1	12	4	5	5.29703e-06	0.931153	0.184955
362	aqp5		wnt1	11	1	5	5.50369e-06	0.332465	0.00733885
6910	tbx5		fgf8, pax2	28	2	9	7.10211e-06	0.692859	0.989763
1908	edn3		wnt1	13	5	7	7.46848e-06	0.983779	0.0324967
1717	dhcr7		pax2	3			7.4802e-06
2016	emx1		fgf8	7			7.64493e-06
9496	tbx4		fgf8	12	1	2	8.16181e-06	0.434115	0.891523
7091	tle4		en2, fgf8	21	5	6	8.59987e-06	0.210325	0.0185953
1749	dlx5		gbx2, wnt1	35	6	11	9.00634e-06	0.432948	0.453366
5013	otx1		fgf8	12	5	6	9.22798e-06	0.612333	0.175936
2487	frzb		wnt1	15		6	9.74008e-06		9.09775e-07
50964	sost		wnt1	13		8	1.02151e-05		0.315562
54756	il17rd		fgf8, pax2	13	2	2	1.06755e-05	0.0984196	0.0442704
2118	etv4		ctnnb1, fgf8, wnt1	49	2	21	1.1061e-05	0.0497227	0.000399119
189	agxt		fgf8	29	2	6	1.15948e-05	0.612955	0.60592
8646	chrd		en2, fgf8	57	4	13	1.1648e-05	0.768516	0.823334
7545	zic1		fgf8, zic3	19	3	6	1.17996e-05	0.197538	0.421933
85416	zic5		fgf8	3			1.24764e-05
22943	dkk1		en1, wnt1	36	5	6	1.43438e-05	0.508617	0.600396
3549	ihh		ext1	31	3	4	1.66865e-05	0.955444	0.824348
5077	pax3		fgf8, wnt1	57	8	13	1.7126e-05	0.724078	0.21904
26035	glce		fgf8	2			1.76649e-05
4009	lmx1a		wnt1	16	3	3	1.85342e-05	0.914747	0.582135
8822	fgf17		fgf8	6	4	4	1.87786e-05	0.300634	0.432193
51450	prrx2		fgf8	6	1	1	1.9107e-05	0.305584	0.284639
10124	arl4a		wnt1	5	1	2	1.97378e-05	0.288226	0.460823
10215	olig2		en1, pax2	43	4	8	2.23946e-05	0.121075	0.0938032
333927	scxa		fgf8	7		1	2.39387e-05		1
5080	pax6		en1, fgf8, pax2	112	24	40	2.41481e-05	0.0399623	4.69497e-06
7062	tchh		fgf8	10		1	2.47023e-05		0.960197
6928	tcf2		fgf8, pax2	31	3	11	2.87014e-05	0.0201536	2.79107e-05
642658	loc642658		fgf8	10		1	2.94105e-05		1
51176	lef1		ctnnb1, wnt1	78	20	37	3.31957e-05	0.0282383	0.0147993
6911	tbx6		fgf8	11		1	3.41148e-05		0.999984
7479	wnt8b		fgf8	2			3.47802e-05
8312	axin1		ctnnb1, fgf8, wnt1	82	31	56	3.60109e-05	0.019623	0.210864
5083	pax9		fgf8	14	2	4	3.69119e-05	0.168212	0.179674
4821	nkx2-2		wnt1	34	1	6	4.28466e-05	0.424261	0.582038
6656	sox1		ctnnb1	10	1	2	4.37269e-05	0.103333	0.00675686
8313	axin2		ctnnb1, wnt1	18	6	7	4.4168e-05	0.000598977	0.000997014
23432	gpr161		pax2	3		3	4.57248e-05		0.000133992
58480	rhou		wnt1	6	4	4	6.06224e-05	0.377352	0.486535
4929	nr4a2		fgf8, wnt1	42	5	13	6.28612e-05	0.183094	0.129249
79191	irx3		en2, fgf8	16		3	6.96221e-05		0.756294
639	prdm1		fgf8	14	5	7	7.09057e-05	0.618251	0.64472
10252	spry1		fgf8	14	2	6	7.18949e-05	0.285781	0.065523
2619	gas1		wnt1	30	3	6	7.23246e-05	0.851154	0.000418882
26959	hbp1		wnt1	22	8	12	8.06973e-05	0.0631608	0.134524
4232	mest		fgf8	2			8.35736e-05
114610	sax1		fgf8	6			8.96567e-05
3223	hoxc6		fgf8	8			9.15004e-05
1848	dusp6		fgf8	33	4	9	0.000119101	0.0518652	0.465865
89780	wnt3a		fgf8, gbx2, wnt1	86	11	13	0.000119263	0.115681	0.000301586
2157	f8		fgf8	43	14	21	0.000129782	0.753957	0.684867
8324	fzd7		wnt1	13	6	9	0.00015245	0.669495	0.539878
85407	nkd1		wnt1	3	1	2	0.000155999	0.326624	0.238588
145258	gsc		fgf8	42	4	12	0.000163154	0.00329885	0.0309063
2719	gpc3		wnt1	13	4	8	0.000169644	0.386892	0.282265
390010	nkx1-2		fgf8	9			0.000178369
1959	egr2		en2, fgf8	67	5	14	0.000190624	0.817623	0.0841813
120237	dbx1		en1	10			0.000206334
8828	nrp2		fgf8	17	8	13	0.000236544	0.675525	0.901781
81848	spry4		fgf8	17	2	6	0.000239685	0.279949	0.00281916
5079	pax5		fgf8, pax2	50	13	26	0.000250807	0.0453908	0.00514164
127343	dmbx1		gbx2	3			0.000256623
7481	wnt11		wnt1	18			0.000263508
3199	hoxa2		fgf8	13	1	3	0.000270614	0.514769	0.7471
650	bmp2		en1, fgf8	139	15	26	0.000280553	0.947912	0.483644
6658	sox3		fgf8	14	1	2	0.000289721	0.256752	0.0379454
5455	pou3f3		pax2	10	5	6	0.000307186	0.786319	0.0190871
7473	wnt3		fgf8	16	1	2	0.000312737	0.560087	0.468066
23512	suz12		wnt1	11	2	5	0.000342246	0.807738	5.72209e-05
6422	sfrp1		wnt1	15	4	6	0.000357736	0.484603	0.000528828
1746	dlx2		fgf8	26	3	6	0.000369178	0.220568	0.351232
50937	cdon		ctnnb1	8	4	5	0.000433172	0.0102072	0.000156339
8854	aldh1a2		fgf8	15			0.000628958
3209	hoxa13		fgf8	15	6	11	0.000647918	0.0319864	0.18906
2294	foxf1			9		4	0.000668647		0.0442156
25806	vax2		pax2	4		2	0.000707754		0.0534796
3791	kdr		ctnnb1, pax2	123	43	60	0.000759997	0.376	0.270589
1602	dach1		pax2	23	10	10	0.000764801	0.0903909	0.19558
4131	map1b		en1, en2	55	22	38	0.000815343	0.238547	0.00278043
11023	vax1		pax2	4		3	0.000824522		0.0016982
8325	fzd8		wnt1	8	5	5	0.000831372	0.137599	0.00630425
6495	six1		pax2	30	8	9	0.000852035	0.396944	0.253777
6932	tcf7			9		2	0.000868269		0.0829788
2290	foxg1b		fgf8	31	15	20	0.000912418	0.0822804	0.0317856
4040	lrp6		wnt1	24	10	13	0.00098642	0.0108315	3.75356e-05
3170	foxa2		en1, en2	71	8	30	0.000989573	0.0686741	0.0804124
27022	foxd3		fgf8	21	1	3	0.00102401	0.376072	0.208151
2128	evx1		en1	7			0.00106669
666	bok		gbx2	11	2	5	0.00109366	0.485348	0.368881
2255	fgf10		fgf8	50	2	6	0.00111375	0.732536	0.00284524
8321	fzd1		wnt1	11	6	7	0.00111621	0.778772	0.676427
23316	cutl2			2	1	1	0.00111901	0.190691	0.169639
168667	bmper			6	3	3	0.00122968	0.962115	0.488647
26585	grem1		fgf8	31	1	4	0.00128816	0.264671	0.912644
7101	nr2e1		pax2	16		5	0.00134696		0.0408394
657	bmpr1a		en1	36	16	16	0.00142638	0.770063	0.766058
1496	ctnna2		wnt1	8	1	3	0.00149175	0.381639	0.0460167
611	opn1sw			26		3	0.00168057		0.851517
8498	ranbp3		wnt1	8	3	4	0.00172772	0.630575	0.763585
2354	fosb		wnt1	26	2	4	0.00175567	0.232449	0.00507358
7482	wnt2b		fgf8	11			0.00186681
5012	otsc1			2		1	0.00188658		0.418354
5396	prrx1		fgf8	17	5	6	0.00189505	0.56622	0.461636
17	aavs1			14		5	0.00190521		0.0913222
9241	nog			7	4	4	0.00192681	0.979902	0.615024
7783	zp2		fgf8	12	2	4	0.00201056	0.997311	0.98916
7786	map3k12		pax2	42	11	23	0.00207659	0.764842	0.0718888
2248	fgf3		fgf8	39	6	10	0.00216948	0.373485	0.011794
7555	cnbp			6			0.00229727
2264	fgfr4		fgf8	33	17	21	0.00246924	0.00500808	0.00283832
375616	crim2			4		2	0.00253111		0.182031
10660	lbx1		pax2	21		1	0.00256949		0.303135
2636	gbx1			2			0.00261136
2254	fgf9		fgf8	40	4	12	0.00261674	0.350191	0.0257503
8403	sox14			4			0.00273635
10220	gdf11		fgf8	20	1	8	0.00274684	0.601567	0.214967
429	ascl1		fgf8	39	6	11	0.00281642	0.0856832	0.00426536
1855	dvl1		ctnnb1, wnt1	60	25	40	0.00288276	0.0367775	0.011909
4041	lrp5		wnt1	28	7	13	0.00332171	0.00118978	0.00130115
51232	crim1			2		2	0.00347289		0.322116
1834	dspp		ext1	67		10	0.00352797		0.125541
10253	spry2		fgf8	34	12	17	0.00359793	0.622364	0.193738
6259	ryk		wnt1	42	5	12	0.00361184	0.01112	0.0159136
3671	islr		wnt1	1			0.00367568
11151	coro1a		wnt1	26	3	9	0.00394929	0.391349	0.44908
1849	dusp7			3	3	3	0.00433348	0.0176269	0.00946719
3237	hoxd11			6	1	2	0.0043537	0.471662	0.192426
5663	psen1		ctnnb1, wnt1	110	49	60	0.00436572	0.292406	0.274395
23287	agtpbp1		fgf8	56	6	9	0.0047456	0.80353	0.160854
1014	cdh16		ctnnb1	2	1	1	0.00491064	0.0848441	0.115133
599	bcl2l2		wnt1	27	8	12	0.00492425	0.845548	0.952146
2926	grsf1		wnt1	1			0.00494374
166	aes			44	20	23	0.00499681	0.499952	0.214228
64321	sox17		ctnnb1	15	1	7	0.00510141	0.0850878	0.239044
57045	twsg1			15	2	7	0.00511483	0.955815	0.698048
64428	narfl			2			0.00515017
8820	hesx1		fgf8	10	2	3	0.0054369	0.562902	0.203514
2250	fgf5		gbx2	10	4	5	0.00549429	0.424413	0.213198
64399	hhip			4	3	3	0.00552958	0.999622	0.0781259
894	ccnd2		wnt1	69	10	25	0.00562506	0.0289244	0.0737097
6926	tbx3			8		3	0.00583374		0.928662
688	klf5		wnt1	37	8	15	0.00584642	0.0314212	0.256682
22976	paxip1		pax2	6	5	6	0.00609986	0.0113061	0.000244707
151516	sasp			6			0.00610778
4753	nell2			4	2	2	0.00612329	0.340084	0.482417
1748	dlx4			6	1	2	0.00627643	0.539783	0.477573
5744	pthlh		phgdh	101	6	17	0.00631776	0.532056	0.536636
7474	wnt5a		wnt1	48	3	7	0.00656068	0.980255	0.801026
117065	prrxl1			7			0.0065744
6637	snrpg		fgf8	29	14	15	0.0069814	0.833883	0.88893
1906	edn1		fgf8, phgdh	154	10	22	0.00760439	0.932129	0.37479
440097	dbx2			9			0.00765231
5352	plod2			7			0.00780658
6662	sox9		fgf8	82	9	28	0.00805616	0.114686	0.414269
11211	fzd10			2		1	0.00815576		0.506994
4824	nkx3-1			13	3	6	0.00841759	0.400648	0.0414589
60529	alx4			17	3	3	0.00871573	0.102273	0.152719
