# Supplementary material for: Looking at Cerebellar Malformations through Text-Mined Interactomes of Mice and Humans
Source: PLoS Comput Biol. 2009 Nov 6;5(11):e1000559. doi: 10.1371/journal.pcbi.1000559 (PMC2767227; doi:10.1371/journal.pcbi.1000559)
Supplement: Table S7 — Initial genes. (0.04 MB XLS) [file pcbi.1000559.s009.xls]

## Sheet: aaa
Gene Symbol	GeneId	degeneration (39)	abnormal foliation (56)	abnormal vermis (24)	absent cerebellum (10)	small cerebellum (70)	ataxia (172)
gli2	2736		1	1		1
ugt8	7368						1
aspa	443						1
hexb	3074	1					1
pou1f1	5449		1
cacna2d2	9254	1		1			1
nlk	51701						1
ext1	2131				1
cacnb4	785						1
dner	92737		1
myh10	4628		1			1	1
synj1	8867						1
aars	16	1					1
nbn	4683		1			1	1
prnp	5621	1					1
cdk5	1020		1
cdkn2c	1031						1
dst	667						1
ctnnb1	1499				1
inpp4a	3631	1				1	1
kcna1	3736						1
dao	1610						1
usp14	9097	1				1	1
etv1	2115						1
fxn	2395						1
aga	175	1					1
lama4	3910						1
thrb	7068					1
kcne1	3753						1
nck1	4690						1
pparg	5468						1
dcc	1630						1
smpd1	6609	1					1
nfia	4774		1
fgf17	8822			1
cstb	1476					1	1
mapk8ip2	23542						1
abr	29		1
bsn	8927						1
hprt1	3251						1
dcamkl1	9201		1			1
atp7b	540						1
itgb1	3688		1	1		1	1
apba2	321						1
bmi1	648						1
neurod4	58158					1	1
scn1a	6323						1
kcnv1	27012						1
dnajc5	80331						1
scn8a	6334	1					1
pax2	5076				1
aifm1	9131	1				1	1
camk4	814						1
stk36	27148						1
slc4a2	6522						1
en2	2020		1	1	1	1
apba1	320						1
phgdh	26227				1
gas1	2619		1			1
atcay	85300						1
b4galnt1	2583						1
rb1	5925			1		1	1
en1	2019		1	1	1	1	1
ube3a	7337					1
xpa	7507	1					1
slc9a1	6548						1
neurod2	4761					1	1
aff1	4299	1					1
ctsd	1509						1
ccnd2	894		1			1
slc12a2	6558						1
idua	3425	1
uchl1	7345						1
fdft1	2222						1
wnt1	7471				1		1
bcr	613		1
disc1	27185					1
bdnf	627						1
unc5c	8633		1			1	1
zic4	84107		1	1		1	1
mthfr	4524					1
ldb1	8861		1			1
vldlr	7436		1			1	1
reln	5649	1				1	1
ube4b	10277	1
hsd17b4	3295						1
npc2	10577	1					1
ngfr	4804						1
nfib	4781		1
cdk5r1	8851		1			1
egfr	1956					1
fas	355		1			1	1
stub1	10273						1
atxn7	6314						1
fgf14	2259						1
itpr1	3708						1
sil1	64374	1					1
plcb4	5332		1			1	1
ctsa	5476						1
gnaq	2776						1
pitpna	5306						1
napa	8775			1
cln8	2055						1
map2k4	6416						1
ppt2	9374						1
kcnc3	3748						1
ugcg	7357						1
thra	7067						1
lhx1	3975		1			1
edaradd	128178	1				1
e2f5	1875						1
kcnj6	3763			1		1	1
ank3	288	1				1	1
sod2	6648						1
otx1	5013		1
tp53	7157		1	1			1
erbb2	2064						1
hydin	54768						1
egr3	1960						1
ntf3	4908		1				1
canx	821						1
kcnj10	3766						1
cbln1	869						1
rora	6095	1	1			1	1
app	351						1
slc19a2	10560						1
kiaa1005	23322					1
mafg	4097						1
ctnna2	1496		1	1		1	1
epm2a	7957	1					1
arsa	410	1					1
ccnd1	595		1			1
tpp1	1200	1					1
aplp2	334						1
shc1	6464						1
smo	6608		1			1
cdkn1b	1027						1
plp1	5354						1
syt2	127833						1
met	4233		1			1
cnp	1267						1
fgf8	2253			1	1
atf2	1386						1
cacng2	10369						1
gli1	2735		1
dscam	1826		1
mbp	4155						1
abcd2	225	1					1
fzd4	8322					1	1
ppt1	5538	1
cbln3	643866						1
fgf12	2257						1
ptch1	5727		1
kcnc1	3746						1
vim	7431	1
atoh1	474		1			1
kl	9365	1
sptbn4	57731						1
npc1	4864	1		1
fgfr1	2260			1
msi1	4440						1
nfix	4784						1
msx2	4488			1
aldh5a1	7915						1
kif1a	547						1
ptgdr	5729						1
ercc6	2074						1
rbl1	5933			1		1	1
mafk	7975						1
pxmp3	5828		1			1
nck2	8440						1
adam22	53616						1
atg5	9474	1					1
xrcc4	7518			1
lrp8	7804		1			1	1
tmem176b	28959		1			1	1
mapt	4137						1
adam23	8745						1
cntn1	1272					1	1
ttl	150465						1
ctsb	1508	1
mecp2	4204						1
cit	11113					1	1
myl1	4632						1
scyl1	57410			1
st8sia4	7903					1
calb1	793						1
pomgnt1	55624		1			1
sepp1	6414						1
gal3st1	9514						1
dcx	1641		1			1
nrcam	4897					1
pgds	27306						1
gbx2	2637				1
foxp2	93986		1			1
grm1	2911						1
ank1	286	1
pten	5728		1				1
scn1b	6324						1
lhx5	64211		1			1
qki	9444	1					1
abcd1	215						1
cplx1	10815						1
ss18l1	26039					1
ercc2	2068	1					1
erbb3	2065			1		1
st8sia2	8128					1
znf423	23090		1	1		1	1
gfi1	2672						1
ttpa	7274						1
pax5	5079		1	1
myo5a	4644						1
cdk5r2	8941		1			1
acp2	53					1	1
npas3	64067		1
galc	2581						1
cacna1a	773					1	1
kcnma1	3778						1
neurod1	4760		1			1	1
atp2b2	491						1
grin1	2902						1
runx3	864						1
uchl3	7347						1
pldn	26258						1
plxnb2	23654		1			1
mapk8ip1	9479						1
zic1	7545		1	1		1	1
ctsl1	1514	1
scnm1	79005						1
zic3	7547				1
ireb2	3658	1					1
cxcr4	7852		1
grid2	2895		1				1
agtpbp1	23287	1					1
myst4	23522		1
shh	6469					1	1
atm	472	1
lmx1a	4009		1	1		1	1
dab1	1600		1			1	1
glb1	2720	1					1
lmx1b	4010					1
psap	5660	1				1	1
pura	5813					1
ddb1	1642					1
