# Supplementary material for: Looking at Cerebellar Malformations through Text-Mined Interactomes of Mice and Humans
Source: PLoS Comput Biol. 2009 Nov 6;5(11):e1000559. doi: 10.1371/journal.pcbi.1000559 (PMC2767227; doi:10.1371/journal.pcbi.1000559)
Supplement: Table S8 — Text corpus description. (0.03 MB XLS) [file pcbi.1000559.s010.xls]

## Sheet: all_journal
Full Journal Name	Number of actionmentions	From Date	To Date
ABSTRACTS	2544370	1961-06-05	2007-06-11
OPENACCESS	94601	1961-04-27	2006-04-28
American journal of pathology	58337	1998-07-01	2006-09-01
Annual review of anthropology	121	1997-10-01	2006-10-01
Annual Review of Biochemistry	11248	1997-01-01	2006-01-01
Annual review of biomedical engineering	1044	1999-01-01	2006-01-01
Annual review of biophysics and biomolecular structure	513	1997-01-01	2005-01-01
Annual review of cell and developmental biology	12969	1996-01-01	2006-11-10
Annual Review of Clinical Psychology	54	2005-04-01	2006-04-01
Annual review of earth and planetary sciences	248	1996-05-01	2006-05-01
Annual review of ecology and systematics	275	1996-11-01	2005-12-01
Annual review of entomology	1203	1997-01-01	2006-01-01
Annual review of fluid mechanics	2	2002-01-01	2002-01-01
Annual review of genetics	7360	1996-01-01	2005-01-01
Annual review of genomics and human genetics	1928	2000-09-01	2006-09-01
Annual review of immunology	18559	1996-01-01	2006-01-01
Annual review of medicine	4902	1994-01-01	2006-01-01
Annual review of microbiology	7154	1996-01-01	2006-01-01
Annual Reviews in Neuroscience	4682	1997-01-01	2006-01-01
Annual review of nuclear science	189	1996-12-01	2005-12-01
Annual review of nutrition	5294	1997-01-01	2006-01-01
Annual Review of Pathology	733	2006-02-01	2006-02-01
Annual review of pharmacology and toxicology	6606	1997-01-01	2006-01-01
Annual review of physical chemistry	519	1996-01-01	2006-01-01
Annual review of physiology	9721	1997-01-01	2006-01-01
Annual review of phytopathology	2621	1996-01-01	2006-01-01
Annual review of plant biology	5228	1996-06-01	2006-06-02
Annual review of plant physiology and plant molecular biology	2526	1996-06-01	2001-06-01
Annual review of psychology	281	1996-01-01	2006-01-01
Annual review of public health	402	1997-01-01	2006-01-01
Annual review of sociology	20	1996-08-01	2006-08-01
Applied and environmental microbiology	52857	1997-10-01	2006-10-01
Arteriosclerosis, Thrombosis, and Vascular Biology	66363	1995-01-01	2006-10-01
Atherosclerosis	23405	1996-09-06	2006-11-01
Biochimica et biophysica acta	96026	1998-04-28	2006-10-01
Biochemical and Biophysical Research Communications	67234	2002-04-05	2004-08-06
Biology of reproduction	38320	1998-07-01	2006-10-01
Brain research	60696	1996-07-22	2006-10-20
Brain research. Molecular brain research	27253	1996-11-01	2005-12-14
British journal of pharmacology	46780	1999-01-01	2003-09-01
Cancer cell	6935	2002-02-01	2003-08-01
Carcinogenesis	39287	1999-01-01	2006-10-01
Cell	75972	1996-01-12	2003-08-22
The Journal Of Cell Biology	149680	1997-01-13	2006-10-23
Chemistry & biology	5457	1999-01-01	2003-08-01
Circulation	62756	1995-01-01	2006-10-24
Circulation Research	74292	1995-01-01	2006-10-13
Clinical and diagnostic laboratory immunology	14528	1998-01-01	2005-12-01
Clinical microbiology reviews	10970	1998-01-01	2006-07-01
Comparative immunology, microbiology and infectious diseases	968	1999-01-01	2006-03-01
Current biology : CB	42291	1994-01-01	2003-09-16
Developmental biology	22735	2003-01-01	2006-10-15
Developmental cell	11891	2001-07-01	2003-09-01
Development	65151	2001-06-01	2006-10-01
Diabetes	32901	2001-01-01	2006-09-01
Diagnostic microbiology and infectious disease	1767	1998-04-01	2003-08-01
The EMBO journal.	212492	1997-01-02	2006-11-01
Eukaryotic cell	9371	2003-12-01	2006-06-01
Experimental neurology	6277	2003-01-01	2006-11-01
FEBS letters	94386	1997-01-06	2006-10-16
FEMS immunology and medical microbiology	8943	1997-01-01	2005-09-01
FEMS microbiology letters	25186	1997-01-01	2005-12-15
FEMS microbiology reviews	6758	1997-02-01	2005-11-01
Gene	31058	1997-01-03	2006-07-19
Gene Expression Patterns	1318	2002-12-01	2007-01-01
Genes & development	103792	1997-08-01	2006-09-15
Genetics	57960	1998-01-01	2006-09-01
Genome research	9900	1997-04-01	2006-09-01
Genomics	115	2005-07-01	2006-07-01
Immunity	48894	1996-01-01	2003-09-01
Infection and immunity	153866	1998-01-01	2006-10-01
Insect biochemistry and molecular biology	7113	1998-01-01	2006-11-01
International journal of developmental neuroscience : the official journal of the International Society for Developmental Neuroscience	4333	1996-10-01	2006-04-01
International journal of food microbiology	3732	1997-08-19	2006-10-01
The Journal of antimicrobial chemotherapy	7820	1999-01-01	2006-08-01
Journal of bacteriology	137459	1998-01-01	2006-10-01
The Journal of biological chemistry	1718690	1995-01-06	2006-10-27
Journal of Clinical Investigation	117684	1996-01-01	2006-10-01
Journal of clinical microbiology	29062	1998-01-01	2006-10-01
Journal of immunology	17716	2006-04-15	2006-07-15
Journal of lipid research	39193	1998-01-01	2006-10-01
Journal of medical microbiology	473	2002-10-01	2003-09-01
Journal of microbiological methods	2502	1999-02-01	2006-11-01
Journal of neurophysiology	1786	2005-11-01	2006-07-01
The Journal of neuroscience : the official journal of the Society for Neuroscience	202893	1996-05-01	2006-10-18
The Journal of pharmacology and experimental therapeutics	111552	1997-01-01	2006-10-01
Learning & memory (Cold Spring Harbor, N.Y.)	3172	1998-05-01	2006-09-01
Mechanisms of development	19868	1998-04-01	2006-09-01
Microbes and infection	27291	1999-01-01	2006-08-01
Microbiology and Molecular Biology Reviews	17372	1998-03-01	2006-09-01
Microbial pathogenesis	3677	1999-08-01	2006-10-01
Molecular Biology Of The CELL	120164	1997-10-01	2006-10-01
Molecular cell	47524	1997-12-01	2003-07-01
Molecular And Cellular Biology	361635	1998-01-01	2006-09-01
Molecular and cellular neuroscience	11777	1999-08-01	2006-10-09
Molecular pharmacology	88372	1997-01-01	2006-10-01
Nature	41263	1997-06-05	2006-09-21
Neurobiology of aging	5518	1996-07-01	2003-10-01
Neurobiology of disease	6259	2003-02-01	2006-10-01
Neurology	324	2006-03-14	2006-06-27
Neuron	40936	1996-01-01	2003-09-11
Neuropharmacology	24592	1996-05-01	2006-10-01
Neuroscience	37370	1996-12-01	2006-10-27
Neuroscience letters	8668	1996-08-16	2004-11-16
Nucleic acids research	62631	1996-01-15	2006-01-01
Proceedings of the National Academy of Sciences of the United States of America	353924	1996-11-12	2006-10-10
Progress in neuro-psychopharmacology & biological psychiatry	1914	2003-02-01	2006-09-30
Research in microbiology	974	1999-09-01	2004-11-01
Science	57244	1995-10-13	2006-10-13
Structure (Cambridge, Mass. : 2001)	5720	1994-01-15	1998-12-15
Veterinary microbiology	6713	1998-02-15	2006-10-31
Yeast	7069	2002-03-30	2006-05-01
